# Supplementary material for: Kartogenin Improves Osteogenesis of Bone Marrow Mesenchymal Stem Cells via Autophagy
Source: Stem Cells Int. 2022 Dec 22;2022:1278921. doi: 10.1155/2022/1278921 (PMC9800103; doi:10.1155/2022/1278921)
Supplement: Supplementary Materials — Supplementary Figure 1: the titration data of KGN for BMMSC osteogenesis. (A) ARS and (B) semiquantification of mineralized nodules of KGN-induced BMMSC osteogenesis at different concentrations from 0.1 μM to 100 μM. Scale bar = 500 μm. (C, D) qRT-PCR showed the expression levels of ALP and Runx2 at different concentrations of KGN. ∗p < 0.05 and ∗∗∗p < 0.001, one-way ANOVA test. [file 1278921.f1.docx]

**Article Title: Kartogenin Improves Osteogenesis of Bone Marrow Mesenchymal Stem Cells via Autophagy**

Huichun Yan 1,2,3, Tingting Yu 1,2,3, Jing Li1,2,3, Ting Zhang 1,2,3, Qian Li 1,2,3, Yanheng Zhou 1,2,3* and Dawei Liu1,2,3,4*

1Department of Orthodontics, Peking University School and Hospital of Stomatology, Beijing 100081, China

2National Clinical Research Center for Oral Diseases & National Engineering Laboratory for Digital and Material Technology of Stomatology, Beijing 100081, China

3Beijing Key Laboratory of Digital Stomatology, Beijing 100081, China

4State Key Laboratory of Military Stomatology, Xi’an 710000, China

*Corresponding authors should be addressed to Yanheng Zhou; [yanhengzhou@vip.163.com](mailto:yanhengzhou@vip.163.com) and Dawei Liu; [liudawei@bjmu.edu.cn](mailto:liudawei@bjmu.edu.cn)

HuiChun Yan and Tingting Yu have contributed equally to this work as co-first authors.

**Supplementary Figure**

**
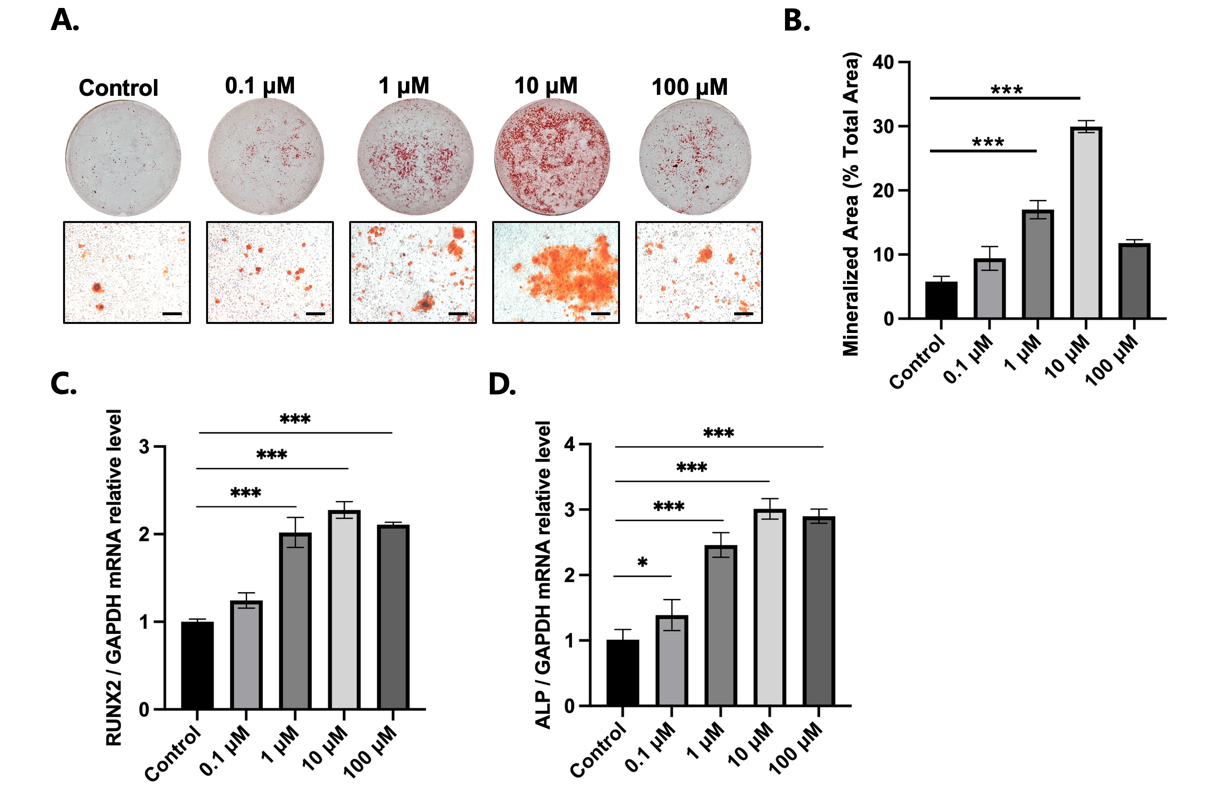
**

**Supplementary Figure 1: The titration data of KGN for BMMSC osteogenesis.** (A) ARS and (B) semi-quantification of mineralized nodules of KGN-induced BMMSC osteogenesis at different concentrations from 0.1μM to 100 μM. Scale bar = 500 μm. (C-D) qRT-PCR showed the expression levels of RUNX2 and ALP at different concentrations of KGN. **p* < 0.05, ****p* < 0.001, one-way ANOVA test.
